# Supplementary material for: Integrated approaches for pathogen monitoring and shotgun metagenomic analysis in Atlantic salmon farming
Source: Sci Rep. 2026 Apr 14;16:17468. doi: 10.1038/s41598-026-48791-x (PMC13237240; doi:10.1038/s41598-026-48791-x)
Supplement: Supplementary file 3 — Supplementary Material 3 [file 41598_2026_48791_MOESM3_ESM.xlsx]

## Sheet: Kruskal_wallis_stats
Run	Metric	KW_statistic	df	p_value
1	Average Read Length	5.47105	2	0.06486
2	Average Read Length	1.41657	2	0.492489
3	Average Read Length	1.62367	2	0.444043
4	Average Read Length	6.86937	2	0.032236
1	Q30 (%)	8.14235	2	0.017057
2	Q30 (%)	10.3842	2	0.00556
3	Q30 (%)	13.3958	2	0.001234
4	Q30 (%)	19.8144	2	5e-05
1	Average Quality	9.5083	2	0.008616
2	Average Quality	18.7177	2	8.6e-05
3	Average Quality	17.171	2	0.000187
4	Average Quality	3.42825	2	0.180121
1	GC Content (%)	2.87644	2	0.23735
2	GC Content (%)	2.44019	2	0.295202
3	GC Content (%)	1.00417	2	0.605266
4	GC Content (%)	1.14691	2	0.563575
1	N50 (bp)	5.80769	2	0.054812
2	N50 (bp)	0.225785	2	0.893247
3	N50 (bp)	0.053556	2	0.973577
4	N50 (bp)	0.726727	2	0.695334

## Sheet: Wilcoxon_pairwise_stats
Run	Metric	Comparison	Raw_P	BH_Adjusted_P
1	Average Read Length	simplex vs duplex	0.060602	0.122144
1	Average Read Length	simplex vs nanofilt	0.665006	0.665006
1	Average Read Length	duplex vs nanofilt	0.081429	0.122144
2	Average Read Length	simplex vs duplex	0.305061	0.538301
2	Average Read Length	simplex vs nanofilt	0.538301	0.538301
2	Average Read Length	duplex vs nanofilt	0.441756	0.538301
3	Average Read Length	simplex vs duplex	0.259233	0.504985
3	Average Read Length	simplex vs nanofilt	0.441756	0.504985
3	Average Read Length	duplex vs nanofilt	0.504985	0.504985
4	Average Read Length	simplex vs duplex	0.016575	0.049725
4	Average Read Length	simplex vs nanofilt	0.112351	0.168527
4	Average Read Length	duplex vs nanofilt	0.193931	0.193931
1	Q30 (%)	simplex vs duplex	0.029401	0.044102
1	Q30 (%)	simplex vs nanofilt	0.297483	0.297483
1	Q30 (%)	duplex vs nanofilt	0.029401	0.044102
2	Q30 (%)	simplex vs duplex	0.023301	0.034951
2	Q30 (%)	simplex vs nanofilt	0.139048	0.139048
2	Q30 (%)	duplex vs nanofilt	0.004666	0.013998
3	Q30 (%)	simplex vs duplex	0.003345	0.005017
3	Q30 (%)	simplex vs nanofilt	0.205131	0.205131
3	Q30 (%)	duplex vs nanofilt	0.001874	0.005017
4	Q30 (%)	simplex vs duplex	0.000268	0.000402
4	Q30 (%)	simplex vs nanofilt	0.210785	0.210785
4	Q30 (%)	duplex vs nanofilt	0.000151	0.000402
1	Average Quality	simplex vs duplex	0.02558	0.03837
1	Average Quality	simplex vs nanofilt	0.05778	0.05778
1	Average Quality	duplex vs nanofilt	0.02558	0.03837
2	Average Quality	simplex vs duplex	0.000306	0.000918
2	Average Quality	simplex vs nanofilt	0.012407	0.012407
2	Average Quality	duplex vs nanofilt	0.001927	0.00289
3	Average Quality	simplex vs duplex	0.00053	0.00159
3	Average Quality	simplex vs nanofilt	0.035569	0.035569
3	Average Quality	duplex vs nanofilt	0.001813	0.00272
4	Average Quality	simplex vs duplex	0.656485	0.656485
4	Average Quality	simplex vs nanofilt	0.042229	0.126687
4	Average Quality	duplex vs nanofilt	0.377729	0.566594
1	GC Content (%)	simplex vs duplex	0.2217	0.33255
1	GC Content (%)	simplex vs nanofilt	0.868661	0.868661
1	GC Content (%)	duplex vs nanofilt	0.180403	0.33255
2	GC Content (%)	simplex vs duplex	0.192284	0.288426
2	GC Content (%)	simplex vs nanofilt	1	1
2	GC Content (%)	duplex vs nanofilt	0.183464	0.288426
3	GC Content (%)	simplex vs duplex	0.402601	0.603901
3	GC Content (%)	simplex vs nanofilt	1	1
3	GC Content (%)	duplex vs nanofilt	0.402601	0.603901
4	GC Content (%)	simplex vs duplex	0.352345	0.598807
4	GC Content (%)	simplex vs nanofilt	0.930134	0.930134
4	GC Content (%)	duplex vs nanofilt	0.399204	0.598807
1	N50 (bp)	simplex vs duplex	0.060602	0.090903
1	N50 (bp)	simplex vs nanofilt	0.665006	0.665006
1	N50 (bp)	duplex vs nanofilt	0.060602	0.090903
2	N50 (bp)	simplex vs duplex	0.719568	0.797634
2	N50 (bp)	simplex vs nanofilt	0.738797	0.797634
2	N50 (bp)	duplex vs nanofilt	0.797634	0.797634
3	N50 (bp)	simplex vs duplex	0.959101	1
3	N50 (bp)	simplex vs nanofilt	0.777867	1
3	N50 (bp)	duplex vs nanofilt	1	1
4	N50 (bp)	simplex vs duplex	0.470486	0.623605
4	N50 (bp)	simplex vs nanofilt	0.623605	0.623605
4	N50 (bp)	duplex vs nanofilt	0.623605	0.623605
