# Supplementary material for: Integrated approaches for pathogen monitoring and shotgun metagenomic analysis in Atlantic salmon farming
Source: Sci Rep. 2026 Apr 14;16:17468. doi: 10.1038/s41598-026-48791-x (PMC13237240; doi:10.1038/s41598-026-48791-x)
Supplement: Supplementary file 4 — Supplementary Material 4 [file 41598_2026_48791_MOESM4_ESM.xlsx]

## Sheet: qc_metrics_per_sample
Base	x_label_meta	Group_meta	Yield	Length_bp	DupPerc	GCperc	Homo sapiens (%)
Sample01	Outlet water (Feb/23)	Hatchery	148105	2292.85	1.70411	50	2.20428
Sample02	Tank water (Feb/23)	Hatchery	152195	2400.88	1.62447	50	1.99005
Sample03	Inlet water (Feb/23)	Hatchery	157250	2171.01	1.37662	50	1.80177
Sample04	Control (Feb/23)	Hatchery	29349	2975.7	1.0324	49	1.99046
Sample05	Outlet water (May/23)	Hatchery	159312	3130.42	3.49518	42	2.29866
Sample06	Tank water (May/23)	Hatchery	154815	3222.52	3.35845	42	2.10694
Sample07	Inlet water (May/23)	Hatchery	175904	2845.72	3.22987	44	1.95442
Sample08	Control (May/23)	Hatchery	25215	3014.94	1.45945	44	2.12601
Sample09	1km from cage - 1m depth (Apr/23)	Seawater sites	174551	3155.01	0.982732	41	6.97479
Sample10	1km from cage - 20m depth (Apr/23)	Seawater sites	190053	2631.45	0.761138	42	8.81079
Sample11	Seawater cage (Apr/23)	Seawater sites	197219	2525	0.547426	41	7.67716
Sample12	Control (Apr/23)	Seawater sites	2921	3022.04	0.581992	48	2.80306
Sample13	1km from cage - 1m depth (May/23)	Seawater sites	167844	2580.25	1.25027	43	8.44264
Sample14	1km from cage - 20m depth (May/23)	Seawater sites	188766	2649.5	0.835785	43	9.68371
Sample15	Seawater cage (May/23)	Seawater sites	174695	2873.84	0.973376	41	6.25592
Sample16	Control (May/23)	Seawater sites	2573	3347.68	0.660707	47	2.18467
Sample17	Seawater cage (Jun/23)	Seawater sites	114526	2356.76	0.338312	40	5.81011
Sample21	Seawater cage (Jul/23)	Seawater sites	187488	2660.1	0.92465	41	8.40641
Sample18	Seawater cage (Aug/23)	Seawater sites	147959	2001.11	0.46403	40	12.4177
Sample19	Control (Aug/23)	Seawater sites	817	2996.59	0.122399	45	3.64372
Sample20	Seawater cage (Sep/23)	Seawater sites	132725	2199.13	0.867412	41	27.6584
Sample22	1km from cage - 1m depth (Oct/23)	Seawater sites	122330	2812.31	0.496763	39	3.98678
Sample23	1km from cage - 20m depth (Oct/23)	Seawater sites	136171	2921.6	0.598115	39	3.73139
Sample24	Seawater cage (Oct/23)	Seawater sites	98969	2866.25	0.209156	39	2.76152
Sample25	Control (Oct/23)	Seawater sites	4985	3007.27	0	41	97.4277
Sample26	Wellboat before treatment	Wellboat	39057	2187.65	7.16133	49	1.7727
Sample27	Wellboat after treatment	Wellboat	23338	1771.53	1.89391	43	54.9405
Sample28	Seawater cage (Dec/23)	Seawater sites	42492	1903.85	0.477737	40	19.2811
Sample30	1km from cage - 1m depth (Feb/24)	Seawater sites	82910	2067.21	0.143529	39	3.99194
Sample31	1km from cage - 20m depth (Feb/24)	Seawater sites	106305	1975.87	0.158023	39	3.95097
Sample32	Seawater cage (Feb/24)	Seawater sites	75339	2132.81	0.102205	39	4.32474
Sample33	Control (Feb/24)	Seawater sites	1011	2509.29	0.197824	42	3.05776
Sample34	200m from cage - 1m depth (Feb/24)	Seawater sites	29579	2352.15	0.0777579	39	3.98647
Sample35	200m from cage - 20m depth (Feb/24)	Seawater sites	14118	2489.65	0.0212495	39	3.77761
Sample29	Negative control	Controls	86	1870.43	0	37	13.4328
SampleStandard	Positive control	Controls	10687	3113.4	0.112286	43	0
SampleT04	Pilot exp. control	Controls	178059	2496.54	1.62904	47	0.78878
