# Supplementary material for: Integrated approaches for pathogen monitoring and shotgun metagenomic analysis in Atlantic salmon farming
Source: Sci Rep. 2026 Apr 14;16:17468. doi: 10.1038/s41598-026-48791-x (PMC13237240; doi:10.1038/s41598-026-48791-x)
Supplement: Supplementary file 5 — Supplementary Material 5 [file 41598_2026_48791_MOESM5_ESM.xlsx]

## Sheet: Taxonomic_ general composition_
Group	Sample	Sample_display	Total_rank (%)	Other (%)	Unclassified (%)
Hatchery	Sample_01	Outlet water (Feb/23)	70.79	1.89	18.31
Hatchery	Sample_02	Tank water (Feb/23)	72.11	1.93	16.9
Hatchery	Sample_03	Inlet water (Feb/23)	69.35	1.97	20.27
Hatchery	Sample_05	Outlet water (May/23)	74.76	1.89	6.83
Hatchery	Sample_06	Tank water (May/23)	74.97	1.75	5.94
Hatchery	Sample_07	Inlet water (May/23)	74.41	1.86	8.64
Seawater sites	Sample_09	1km from cage - 1m depth (Apr/23)	61.82	4.62	18.75
Seawater sites	Sample_10	1km from cage - 20m depth (Apr/23)	57.6	4.53	22.59
Seawater sites	Sample_11	Seawater cage (Apr/23)	59.22	5.51	22.22
Seawater sites	Sample_13	1km from cage - 1m depth (May/23)	59.72	2.93	21.51
Seawater sites	Sample_14	1km from cage - 20m depth (May/23)	57.74	3.19	22.63
Seawater sites	Sample_15	Seawater cage (May/23)	62.87	4.33	19.05
Seawater sites	Sample_17	Seawater cage (Jun/23)	58.19	5.18	24.99
Seawater sites	Sample_21	Seawater cage (Jul/23)	58.14	5.61	22.69
Seawater sites	Sample_18	Seawater cage (Aug/23)	53.06	5.67	28.46
Seawater sites	Sample_20	Seawater cage (Sep/23)	40.35	3.17	32.13
Seawater sites	Sample_22	1km from cage - 1m depth (Oct/23)	61.22	7.27	20.63
Seawater sites	Sample_23	1km from cage - 20m depth (Oct/23)	62.41	7.14	19.15
Seawater sites	Sample_24	Seawater cage (Oct/23)	70.26	5.8	14.89
Seawater sites	Sample_28	Seawater cage (Dec/23)	47.04	3.13	31.45
Seawater sites	Sample_30	1km from cage - 1m depth (Feb/24)	55.95	5.48	28.79
Seawater sites	Sample_31	1km from cage - 20m depth (Feb/24)	55.2	5.42	30.17
Seawater sites	Sample_32	Seawater cage (Feb/24)	57.47	5.42	27.02
Seawater sites	Sample_34	200m from cage - 1m depth (Feb/24)	58.79	5.53	25.03
Seawater sites	Sample_35	200m from cage - 20m depth (Feb/24)	59.65	5.64	23.69
Wellboat	Sample_26	Wellboat before treatment	59.09	2.44	27.64
Wellboat	Sample_27	Wellboat after treatment	21.38	0.86	43.5
Controls	Sample_(29)NegativeShield	Negative control	51.15	2.32	22.09
Controls	Sample_T04	Pilot exp. control	97.56	0	1.53
Controls	Sample_ZymoStandard	Positive control	99.99	0.01	0.01
